# Supplementary material
Source: Springer Nature journal article supplement (https://www.springermedizin.de/resource/supplementary/12885_2014_4810_MOESM5_ESM.pdf/9467350)

**A**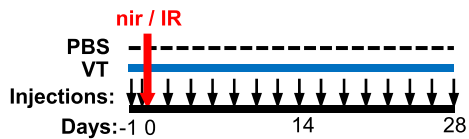

- PBS + IR (n=8  $\leq$ D14 < n=5)
- VT+ IR (n=8  $\leq$ D14 < n=5)
- PBS nir (n=3)
- VT nir (n=3)

**C**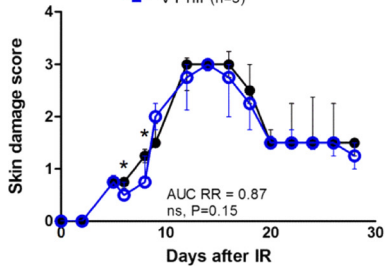**D**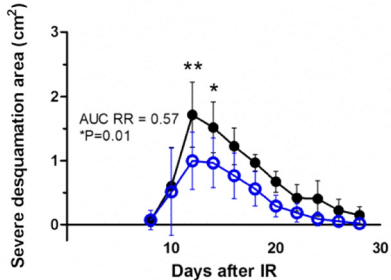**B**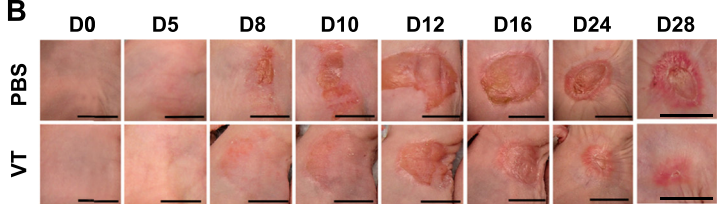**E**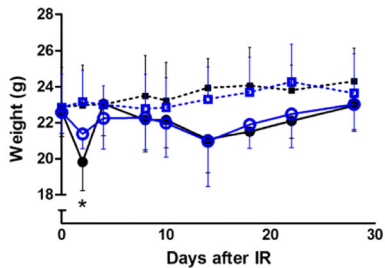

Supplement: MOESM5 [file 9467350]
